# Supplementary material for: Effectiveness and cost-effectiveness of a combined lifestyle intervention compared with usual care for patients with early-stage knee osteoarthritis who are overweight (LITE): protocol for a randomised controlled trial
Source: HighWire-hosted journal article supplement (doi:10.1136/bmjopen-2021-059554), 2022-03-01
Supplement: bmjopen-2021-059554supp002_data_supplement.pdf [file bmjopen-2021-059554supp002_data_supplement.pdf]

Proefpersoneninformatie

Leefstijl en knieartrose

**Bijlage C: toestemmingsformulier proefpersoon**

Behorende bij

**Leefstijl en knieartrose**

- Ik heb de informatiebrief gelezen. Ook kon ik vragen stellen. Mijn vragen zijn goed genoeg beantwoord. Ik had genoeg tijd om te beslissen of ik meedoe.
- Ik weet dat meedoen vrijwillig is. Ook weet ik dat ik op ieder moment kan beslissen om toch niet mee te doen met het onderzoek. Of om ermee te stoppen. Ik hoef dan niet te zeggen waarom ik wil stoppen.
- Ik geef de onderzoeker toestemming om mijn huisarts te laten weten dat ik meedoe aan dit onderzoek.
- Ik geef de onderzoeker toestemming om mijn huisarts of specialist informatie te geven over onverwachte bevindingen uit het onderzoek die van belang zijn voor mijn gezondheid.
- Ik geef de onderzoekers toestemming om mijn onderzoeksgegevens en lichaamsmateriaal te verzamelen en gebruiken.
- Ik weet dat mijn gecodeerde gegevens naar landen buiten de EU worden gestuurd. Hier gelden niet de privacyregels van de EU en kan niet precies hetzelfde beschermingsniveau worden bereikt als binnen de EU.
- Ik weet dat voor de controle van het onderzoek sommige mensen al mijn gegevens kunnen inzien. Die mensen staan in deze informatiebrief. Ik geef deze mensen toestemming om mijn gegevens in te zien voor deze controle.

- Wilt u in de tabel hieronder ja of nee aankruisen?

|                                                                                                                                                                                                                                                                  |                             |                              |
|------------------------------------------------------------------------------------------------------------------------------------------------------------------------------------------------------------------------------------------------------------------|-----------------------------|------------------------------|
| Ik geef toestemming om mijn gegevens maximaal 15 jaar te bewaren om dit te gebruiken voor ander wetenschappelijk onderzoek in binnen- en buitenland, zoals in de informatiebrief staat vermeld.                                                                  | Ja <input type="checkbox"/> | Nee <input type="checkbox"/> |
| Ik geef toestemming om mijn (overgebleven) lichaamsmateriaal te bewaren om dit te gebruiken voor ander wetenschappelijk onderzoek in binnen- en buitenland, zoals in de informatiebrief staat vermeld. Het lichaamsmateriaal wordt daarvoor nog 15 jaar bewaard. | Ja <input type="checkbox"/> | Nee <input type="checkbox"/> |
| Ik geef toestemming om mij eventueel na dit onderzoek te vragen of ik wil meedoen met een vervolgonderzoek.                                                                                                                                                      | Ja <input type="checkbox"/> | Nee <input type="checkbox"/> |
| Ik geef toestemming voor bloedafname voor DNA.                                                                                                                                                                                                                   | Ja <input type="checkbox"/> | Nee <input type="checkbox"/> |

- Ik wil meedoen aan dit onderzoek.

Mijn naam is (proefpersoon): .....

Handtekening: .....

Datum : \_\_ / \_\_ / \_\_

Proefpersoneninformatie

Leefstijl en knieartrose

-----

Ik verklaar dat ik deze proefpersoon volledig heb geïnformeerd over het genoemde onderzoek.

Wordt er tijdens het onderzoek informatie bekend die de toestemming van de proefpersoon kan beïnvloeden? Dan laat ik dit op tijd weten aan deze proefpersoon.

Naam onderzoeker (of diens vertegenwoordiger):.....

Handtekening:.....

Datum: \_\_ / \_\_ / \_\_

*De proefpersoon krijgt een volledige informatiebrief mee, samen met een getekende versie van het toestemmingsformulier.*
